# Supplementary material for: A Novel Approach to Enhance Anti-fungal Properties via Formation of Needle and Blade–like Microstructures Composed of Metal Oxide Nanoparticles and C-dots
Source: Research Square preprint supplement (doi:10.21203/rs.3.rs-5710132/v1), 2025-05-14

ANNEXURE - 2

**Figure 17:** Optical microscopy of (a) DMcT + 4 mg/25 ml DW ZnO NPs (b) DMcT + 4 mg/25 ml DW MgO NPs (c) DMcT + Neem (Conc.- C1) (d) DMcT + Rosemary (Conc.-C1)

(a)


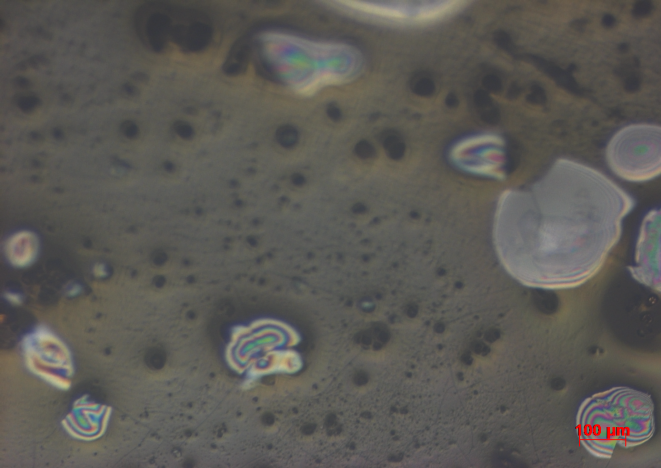


(b)


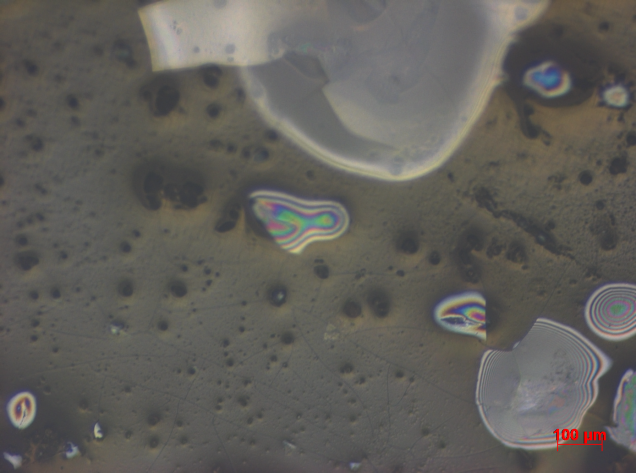


(c)


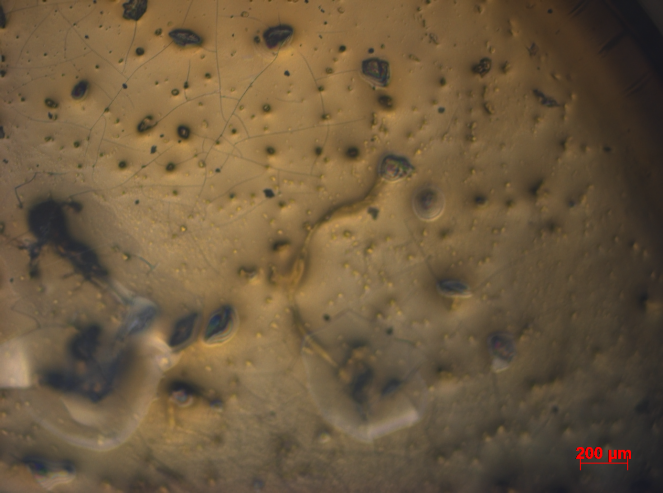


(d)


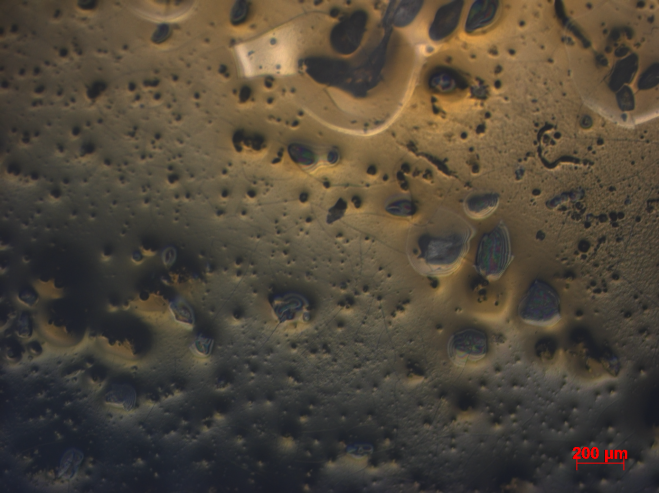

Supplement: Supplementary file 1 [file 44c601e072667de88aa4bdff.docx]
