# Supplementary material for: A Novel Approach to Enhance Anti-fungal Properties via Formation of Needle and Blade–like Microstructures Composed of Metal Oxide Nanoparticles and C-dots
Source: Research Square preprint supplement (doi:10.21203/rs.3.rs-5710132/v1), 2025-05-14
Supplement: Supplementary file 2 [file 5bd942c8204510d0fef310d9.docx]

**ANNEXURE-1**

**Figure 9:** FTIR spectra of synthesized (a) PureDMcT(b) MgO (c) MgO NPs + DMcT (d) ZnO (e) ZnO NPs +DMcT

(a)

(b)

(c)

(d)

(e)

**Figure 10:** FTIR spectra of (a) Neem CDs (b) Neem CDs + DMcT (c) Rosemary CDs

(d) Rosemary + DMcT

(a)

(b)

(c)

(d)
